# Supplementary material for: Insights into the Relative Abundance, Life History, and Ecology of Oceanic Sharks in the Eastern Bahamas
Source: MDPI journal article supplement (doi:10.3390/su16010200), 2023-12-25
Supplement: s1 [file s1]

# **Insights into the Relative Abundance, Life History, and Ecology of Oceanic Sharks in the Eastern Bahamas**

Brendan S. Talwar, Edward J. Brooks, Debra L. Abercrombie, Brenda Anderson, Mark E. Bond, Annabelle M.L. Brooks, Demian D. Chapman, Gina M. Clementi, Candace Y.A. Fields, Jim Gelsleichter, R. Dean Grubbs, Lucy A. Howey, Lance K.B. Jordan, Jeremy J. Kiszka, Ryan J. Knotek, Yannis P. Papastamatiou, Cheston T. Peterson, Eric V.C. Schneider, Oliver N. Shipley, Sean Williams, Maggie M. Winchester, Michael R. Heithaus

## **Supplementary Material**

**Table S1.** Growth of mature oceanic whitetip sharks *Carcharhinus longimanus* ( $n = 22$ )

recaptured at Columbus Point, Cat Island and one immature silky shark *Carcharhinus falciformis*

recaptured at northeastern Exuma Sound, in the eastern Bahamas.

| Species                | Sex    | Initial PCL | Initial STL | Recapture PCL | Recapture STL | Days-at-liberty | Growth (PCL; cm yr <sup>-1</sup> ) | Growth (STL; cm yr <sup>-1</sup> ) |
|------------------------|--------|-------------|-------------|---------------|---------------|-----------------|------------------------------------|------------------------------------|
| Oceanic whitetip shark | Female | 156         | 233         | 170           | 233           | 714             | 7.3                                | -0.1                               |
|                        | Female | 159         | 213         | 172           | 241           | 729             | 6.8                                | 14.0                               |
|                        | Female | 160         | 223         | 175           | 238           | 346             | 15.6                               | 15.4                               |
|                        | Female | 170         | 229         | 177           | 247           | 725             | 3.5                                | 9.1                                |
|                        | Female | 175         | 238         | 170           | 241           | 733             | -2.5                               | 1.5                                |
|                        | Female | 178         | 244         | 196           | 259           | 1446            | 4.5                                | 3.8                                |
|                        | Female | 180         | 248         | 190           |               | 1822            | 2.0                                |                                    |
|                        | Female | 180         | 244         | 195           | 267           | 727             | 7.5                                | 11.5                               |
|                        | Female | 180         | 251         | 199           | 278           | 1818            | 3.8                                | 5.4                                |
|                        | Female | 183         | 253         | 180           | 244           | 362             | -2.9                               | -8.8                               |
|                        | Female | 183         | 264         | 188           | 255           | 734             | 2.5                                | -4.3                               |
|                        | Female | 185         | 248         | 178           | 244           | 366             | -7.2                               | -4.1                               |
|                        | Female | 185         | 254         | 192           | 260           | 1455            | 1.7                                | 1.5                                |
|                        | Female | 190         | 250         | 185           | 254           | 364             | -4.6                               | 4.0                                |
|                        | Female | 190         | 262         | 200           | 270           | 726             | 5.0                                | 4.0                                |
|                        | Female | 192         | 261         | 190           | 260           | 719             | -1.0                               | -0.5                               |
|                        | Female | 196         | 271         | 190           | 264           | 353             | -5.8                               | -6.7                               |
|                        | Female | 196         | 259         | 214           | 288           | 1086            | 6.2                                | 9.7                                |
|                        | Female | 198         | 268         | 192           | 267           | 387             | -5.7                               | -0.8                               |
|                        | Female | 200         | 270         | 196           |               | 377             | -3.9                               |                                    |
|                        | Female | 201         | 268         | 204.5         | 266           | 1100            | 1.2                                | -0.7                               |
|                        | Male   | 185         | 249         | 176           | 247           | 356             | -9.7                               | -2.0                               |
| Silky shark            | Female | 87          | 120         | 105           | 144           | 339             | 19                                 | 26                                 |

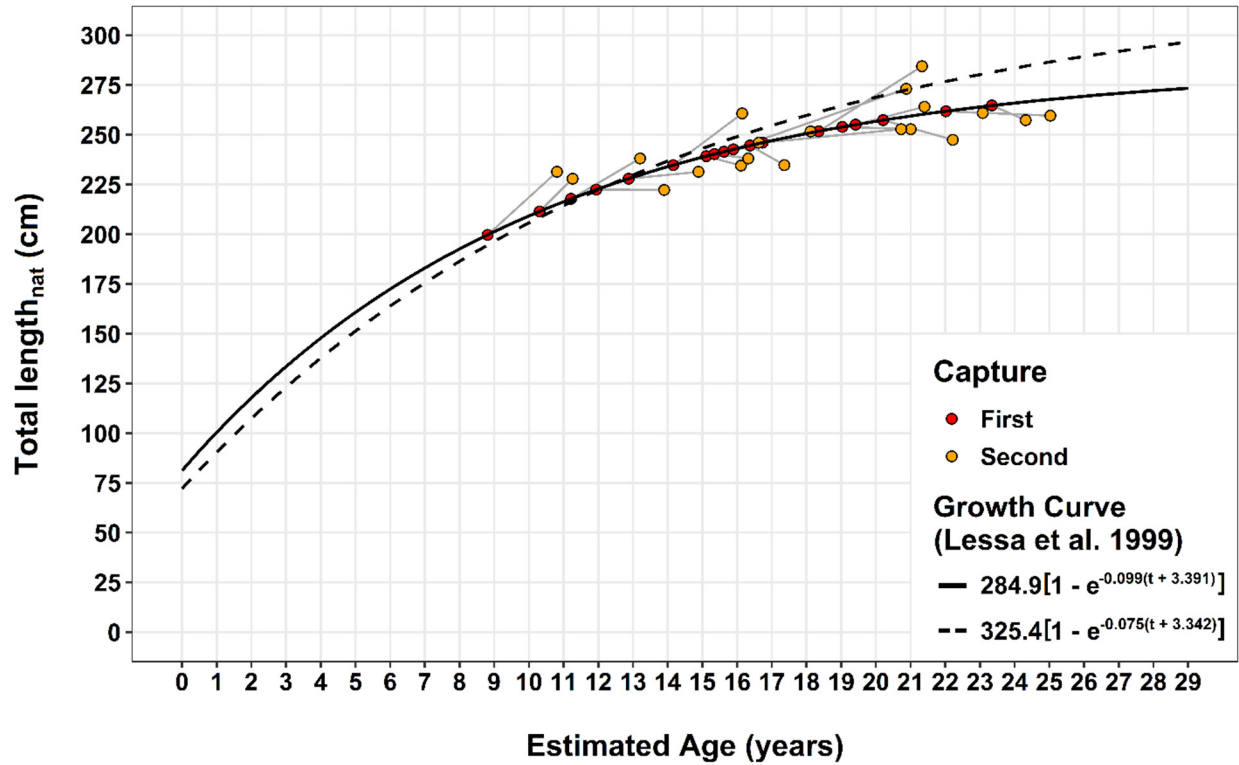

**Figure S1.** Oceanic whitetip shark *Carcharhinus longimanus* growth (TL<sub>nat</sub> cm; converted from STL using the equation from this study; Table 2) measured between capture (red circles) and recapture (orange circles) events from 2011 to 2018 at Columbus Point, Cat Island, The Bahamas, where TL<sub>nat</sub> at first capture was substituted into the von Bertalanffy growth equation generated from observed length-at-age data (solid line; [85]) to estimate age at capture, and age at recapture was then calculated by adding the known years at liberty. A similar growth equation generated from back-calculated lengths (dashed line; [85]) is provided for additional context.
